# Supplementary material for: Structure-Function Analysis of STRUBBELIG, an Arabidopsis Atypical Receptor-Like Kinase Involved in Tissue Morphogenesis
Source: PubMed Central journal article supplement (PMC3095605; doi:10.1371/journal.pone.0019730), 2011-05-16
Supplement: pone.0019730.s002.pdf [file pone.0019730.s002.pdf]

AT1G11130.1\_Acc\_ICE98 GHQTLAQWAI PRL HDIDAL TRMVDP SLHGAYPMKSLSRFADII SRSLQME 750  
AT1G11130.1\_Acc\_ICE97 GHQTLAQWAI PRL HDIDAL TRMVDP SLHGAYPMKSLSRFADII SRSLQME 750  
AT1G11130.1\_Acc\_ICE92 GHQTLAQWAI PRL HDIDAL TRMVDP SLHGAYPMKSLSRFADII SRSLQME 750  
AT1G11130.1\_Acc\_ICE79 GHQTLAQWAI PRL HDIDAL TRMVDP SLHGAYPMKSLSRFADII SRSLQME 750  
AT1G11130.1\_Acc\_ICE75 GHQTLAQWAI PRL HDIDAL TRMVDP SLHGAYPMKSLSRFADII SRSLQME 750  
AT1G11130.1\_Acc\_ICE71 GHQTLAQWAI PRL HDIDAL TRMVDP SLHGAYPMKSLSRFADII SRSLQME 750  
AT1G11130.1\_Acc\_ICE7 GHQTLAQWAI PRL HDIDAL TRMVDP SLHGAYPMKSLSRFADII SRSLQME 750  
AT1G11130.1\_Acc\_ICE49 GHQTLAQWAI PRL HDIDAL TRMVDP SLHGAYPMKSLSRFADII SRSLQME 750  
AT1G11130.1\_Acc\_ICE36 GHQTLAQWAI PRL HDIDAL TRMVDP SLHGAYPMKSLSRFADII SRSLQME 750  
AT1G11130.1\_Acc\_ICE33 GHQTLAQWAI PRL HDIDAL TRMVDP SLHGAYPMKSLSRFADII SRSLQME 750  
AT1G11130.1\_Acc\_ICE228 GHQTLAQWAI PRL HDIDAL TRMVDP SLHGAYPMKSLSRFADII SRSLQME 750  
AT1G11130.1\_Acc\_ICE213 GHQTLAQWAI PRL HDIDAL TRMVDP SLHGAYPMKSLSRFADII SRSLQME 750  
AT1G11130.1\_Acc\_ICE212 GHQTLAQWAI PRL HDIDAL TRMVDP SLHGAYPMKSLSRFADII SRSLQME 750  
AT1G11130.1\_Acc\_ICE21 GHQTLAQWAI PRL HDIDAL TRMVDP SLHGAYPMKSLSRFADII SRSLQME 750  
AT1G11130.1\_Acc\_ICE173 GHQTLAQWAI PRL HDIDAL TRMVDP SLHGAYPMKSLSRFADII SRSLQME 750  
AT1G11130.1\_Acc\_ICE169 GHQTLAQWAI PRL HDIDAL TRMVDP SLHGAYPMKSLSRFADII SRSLQME 750  
AT1G11130.1\_Acc\_ICE153 GHQTLAQWAI PRL HDIDAL TRMVDP SLHGAYPMKSLSRFADII SRSLQME 750  
AT1G11130.1\_Acc\_ICE150 GHQTLAQWAI PRL HDIDAL TRMVDP SLHGAYPMKSLSRFADII SRSLQME 750  
AT1G11130.1\_Acc\_ICE138 GHQTLAQWAI PRL HDIDAL TRMVDP SLHGAYPMKSLSRFADII SRSLQME 750  
AT1G11130.1\_Acc\_ICE134 GHQTLAQWAI PRL HDIDAL TRMVDP SLHGAYPMKSLSRFADII SRSLQME 750  
AT1G11130.1\_Acc\_ICE130 GHQTLAQWAI PRL HDIDAL TRMVDP SLHGAYPMKSLSRFADII SRSLQME 750  
AT1G11130.1\_Acc\_ICE119 GHQTLAQWAI PRL HDIDAL TRMVDP SLHGAYPMKSLSRFADII SRSLQME 750  
AT1G11130.1\_Acc\_ICE111 GHQTLAQWAI PRL HDIDAL TRMVDP SLHGAYPMKSLSRFADII SRSLQME 750  
AT1G11130.1\_Acc\_ICE106 GHQTLAQWAI PRL HDIDAL TRMVDP SLHGAYPMKSLSRFADII SRSLQME 750  
AT1G11130.1\_Acc\_ICE104 GHQTLAQWAI PRL HDIDAL TRMVDP SLHGAYPMKSLSRFADII SRSLQME 750  
AT1G11130.1\_Acc\_ICE1 AT1G11130.1\_Acc\_Fei-0 GHQTLAQWAI PRL HDIDAL TRMVDP SLHGAYPMKSLSRFADII SRSLQME 750  
AT1G11130.1\_Acc\_Dog-4 AT1G11130.1\_Acc\_Cdm-0 GHQTLAQWAI PRL HDIDAL TRMVDP SLHGAYPMKSLSRFADII SRSLQME 750  
AT1G11130.1\_Acc\_Bak-2 AT1G11130.1\_Acc\_Agu-1 GHQTLAQWAI PRL HDIDAL TRMVDP SLHGAYPMKSLSRFADII SRSLQME 750  
AT1G11130.1\_REF AT1G11130.1\_Acc\_ICE120 GHQTLAQWAI PRL HDIDAL TRMVDP SLHGAYPMKSLSRFADII SRSLQME 750  
AT1G11130.1\_Acc\_Tuescha-9 AT1G11130.1\_Acc\_TueWa1-2 GHQTLAQWAI PRL HDIDAL TRMVDP SLHGAYPMKSLSRFADII SRSLQME 750  
AT1G11130.1\_Acc\_Vash-1 AT1G11130.1\_Acc\_Pra-6 GHQTLAQWAI PRL HDIDAL TRMVDP SLHGAYPMKSLSRFADII SRSLQME 750  
AT1G11130.1\_Acc\_ICE102 AT1G11130.1\_Acc\_Qui-0 GHQTLAQWAI PRL HDIDAL TRMVDP SLHGAYPMKSLSRFADII SRSLQME 750  
AT1G11130.1\_Acc\_ICE61 AT1G11130.1\_Acc\_ICE61 GHQTLAQWAI PRL HDIDAL TRMVDP SLHGAYPMKSLSRFADII SRSLQME 750  
\*\*\*\*\*

AT1G11130.1\_Acc\_Del-10 PGFRPP ISEIVQDLQHMI 768  
AT1G11130.1\_Acc\_ICE107 PGFRPP ISEIVQDLQHMI 768  
AT1G11130.1\_Acc\_Niel-2 PGFRPP ISEIVQDLQHMI 768  
AT1G11130.1\_Acc\_Ped-0 PGFRPP ISEIVQDLQHMI 768  
AT1G11130.1\_Acc\_Koch-1 PGFRPP ISEIVQDLQHMI 768  
AT1G11130.1\_Acc\_TueSB30-3 PGFRPP ISEIVQDLQHMI 768  
AT1G11130.1\_Acc\_Yeg-1 PGFRPP ISEIVQDLQHMI 768  
AT1G11130.1\_Acc\_ICE216 PGFRPP ISEIVQDLQHMI 768  
AT1G11130.1\_Acc\_ICE72 PGFRPP ISEIVQDLQHMI 768  
AT1G11130.1\_Acc\_ICE50 PGFRPP ISEIVQDLQHMI 768  
AT1G11130.1\_Acc\_ICE60 PGFRPP ISEIVQDLQHMI 768  
AT1G11130.1\_Acc\_Mer-6 PGFRPP ISEIVQDLQHMI 768  
AT1G11130.1\_Acc\_Nemrut-1 PGFRPP ISEIVQDLQHMI 768  
AT1G11130.1\_Acc\_Sha PGFRPP ISEIVQDLQHMI 768  
AT1G11130.1\_Acc\_Rue3-1-31 PGFRPP ISEIVQDLQHMI 768  
AT1G11130.1\_Acc\_Leo-1 PGFRPP ISEIVQDLQHMI 768  
AT1G11130.1\_Acc\_Istisu-1 PGFRPP ISEIVQDLQHMI 768  
AT1G11130.1\_Acc\_ICE98 PGFRPP ISEIVQDLQHMI 768  
AT1G11130.1\_Acc\_ICE97 PGFRPP ISEIVQDLQHMI 768  
AT1G11130.1\_Acc\_ICE92 PGFRPP ISEIVQDLQHMI 768  
AT1G11130.1\_Acc\_ICE79 PGFRPP ISEIVQDLQHMI 768  
AT1G11130.1\_Acc\_ICE75 PGFRPP ISEIVQDLQHMI 768  
AT1G11130.1\_Acc\_ICE71 PGFRPP ISEIVQDLQHMI 768  
AT1G11130.1\_Acc\_ICE7 PGFRPP ISEIVQDLQHMI 768  
AT1G11130.1\_Acc\_ICE49 PGFRPP ISEIVQDLQHMI 768  
AT1G11130.1\_Acc\_ICE36 PGFRPP ISEIVQDLQHMI 768  
AT1G11130.1\_Acc\_ICE33 PGFRPP ISEIVQDLQHMI 768  
AT1G11130.1\_Acc\_ICE228 PGFRPP ISEIVQDLQHMI 768  
AT1G11130.1\_Acc\_ICE213 PGFRPP ISEIVQDLQHMI 768  
AT1G11130.1\_Acc\_ICE212 PGFRPP ISEIVQDLQHMI 768  
AT1G11130.1\_Acc\_ICE21 PGFRPP ISEIVQDLQHMI 768  
AT1G11130.1\_Acc\_ICE173 PGFRPP ISEIVQDLQHMI 768  
AT1G11130.1\_Acc\_ICE169 PGFRPP ISEIVQDLQHMI 768  
AT1G11130.1\_Acc\_ICE153 PGFRPP ISEIVQDLQHMI 768  
AT1G11130.1\_Acc\_ICE150 PGFRPP ISEIVQDLQHMI 768  
AT1G11130.1\_Acc\_ICE138 PGFRPP ISEIVQDLQHMI 768  
AT1G11130.1\_Acc\_ICE134 PGFRPP ISEIVQDLQHMI 768  
AT1G11130.1\_Acc\_ICE130 PGFRPP ISEIVQDLQHMI 768  
AT1G11130.1\_Acc\_ICE119 PGFRPP ISEIVQDLQHMI 768  
AT1G11130.1\_Acc\_ICE111 PGFRPP ISEIVQDLQHMI 768  
AT1G11130.1\_Acc\_ICE106 PGFRPP ISEIVQDLQHMI 768  
AT1G11130.1\_Acc\_ICE104 PGFRPP ISEIVQDLQHMI 768  
AT1G11130.1\_Acc\_ICE1 PGFRPP ISEIVQDLQHMI 768  
AT1G11130.1\_Acc\_Fei-0 PGFRPP ISEIVQDLQHMI 768  
AT1G11130.1\_Acc\_Dog-4 PGFRPP ISEIVQDLQHMI 768  
AT1G11130.1\_Acc\_Cdm-0 PGFRPP ISEIVQDLQHMI 768  
AT1G11130.1\_Acc\_Bak-2 PGFRPP ISEIVQDLQHMI 768  
AT1G11130.1\_Acc\_Agu-1 PGFRPP ISEIVQDLQHMI 768  
AT1G11130.1\_REF PGFRPP ISEIVQDLQHMI 768  
AT1G11130.1\_Acc\_ICE120 PGFRPP ISEIVQDLQHMI 768  
AT1G11130.1\_Acc\_Tuescha-9 PGFRPP ISEIVQDLQHMI 768  
AT1G11130.1\_Acc\_TueWa1-2 PGFRPP ISEIVQDLQHMI 768

|                        |                    |     |
|------------------------|--------------------|-----|
| AT1G11130.1_Acc_Vash-1 | PGFRPPISEIVQDLQHMI | 768 |
| AT1G11130.1_Acc_Pra-6  | PGFRPPISEIVQDLQHMI | 768 |
| AT1G11130.1_Acc_ICE102 | PGFRPPISEIVQDLQHMI | 768 |
| AT1G11130.1_Acc_QUI-0  | PGFRPPISEIVQDLQHMI | 768 |
| AT1G11130.1_Acc_ICE61  | PGFRPPISEIVQDLQHMI | 768 |
|                        | *****              |     |
